# Supplementary material
Source: ML conference proceedings conference paper supplement (https://aclanthology.org/2025.woah-1.20)
Supplement: SupplementaryMaterial [file 2025.woah-1.20.SupplementaryMaterial.zip]

Starting retrieval for user\_query=@USER @USER Men are physically stronger. Women gestate babies. Pointless for any1 to whine that this denies them e

🔍 DEBUG: Retrieved 7 docs for query 22:

Doc 0 metadata: {'row': 18013, 'source': 'Twitter', 'start\_index': 0, 'language': 'fr'}

Doc 1 metadata: {'source': 'Twitter', 'row': 20680, 'language': 'fr', 'start\_index': 0}

Doc 2 metadata: {'row': 26008, 'start\_index': 0, 'source': 'Twitter', 'language': 'fr'}

Doc 3 metadata: {'start\_index': 0, 'row': 25283, 'source': 'Twitter', 'language': 'fr'}

Doc 4 metadata: {'start\_index': 0, 'row': 20566, 'source': 'Twitter', 'language': 'fr'}

Doc 5 metadata: {'source': 'Twitter', 'row': 23468, 'start\_index': 0, 'language': 'fr'}

Doc 6 metadata: {'source': 'Twitter', 'row': 28534, 'language': 'fr', 'start\_index': 0}

Processing queries: 2%|| | 23/1000 [00:16<09:43, 1.67it/s]Setting `pad\_token\_id` to `eos\_token\_id`:128001 for open-end generation.

Query processed in 0.57 seconds
